# Supplementary material for: Selective plasticity of callosal neurons in the adult contralesional cortex following murine traumatic brain injury
Source: Springer Nature journal article supplement (doi:10.1038/s41467-022-29992-0), 2022-05-12
Supplement: MOESM4 [file 41467_2022_29992_MOESM4_ESM.pdf › 41467_2022_29992_MOESM4_ESM.pdf]

Title: Supplementary Movie 1:

Description: Movie of a cleared brain with trans-synaptic retrograde tracing using rabies virus to identify the general location of presynaptic inputs of callosal neurons in control animals (green label) and following traumatic brain injury (red label).
